# Supplementary material
Source: PubMed Central journal article supplement (PMC4838522)
Supplement: NIHMS771564-supplement-01.pdf [file NIHMS771564-supplement-01.pdf]

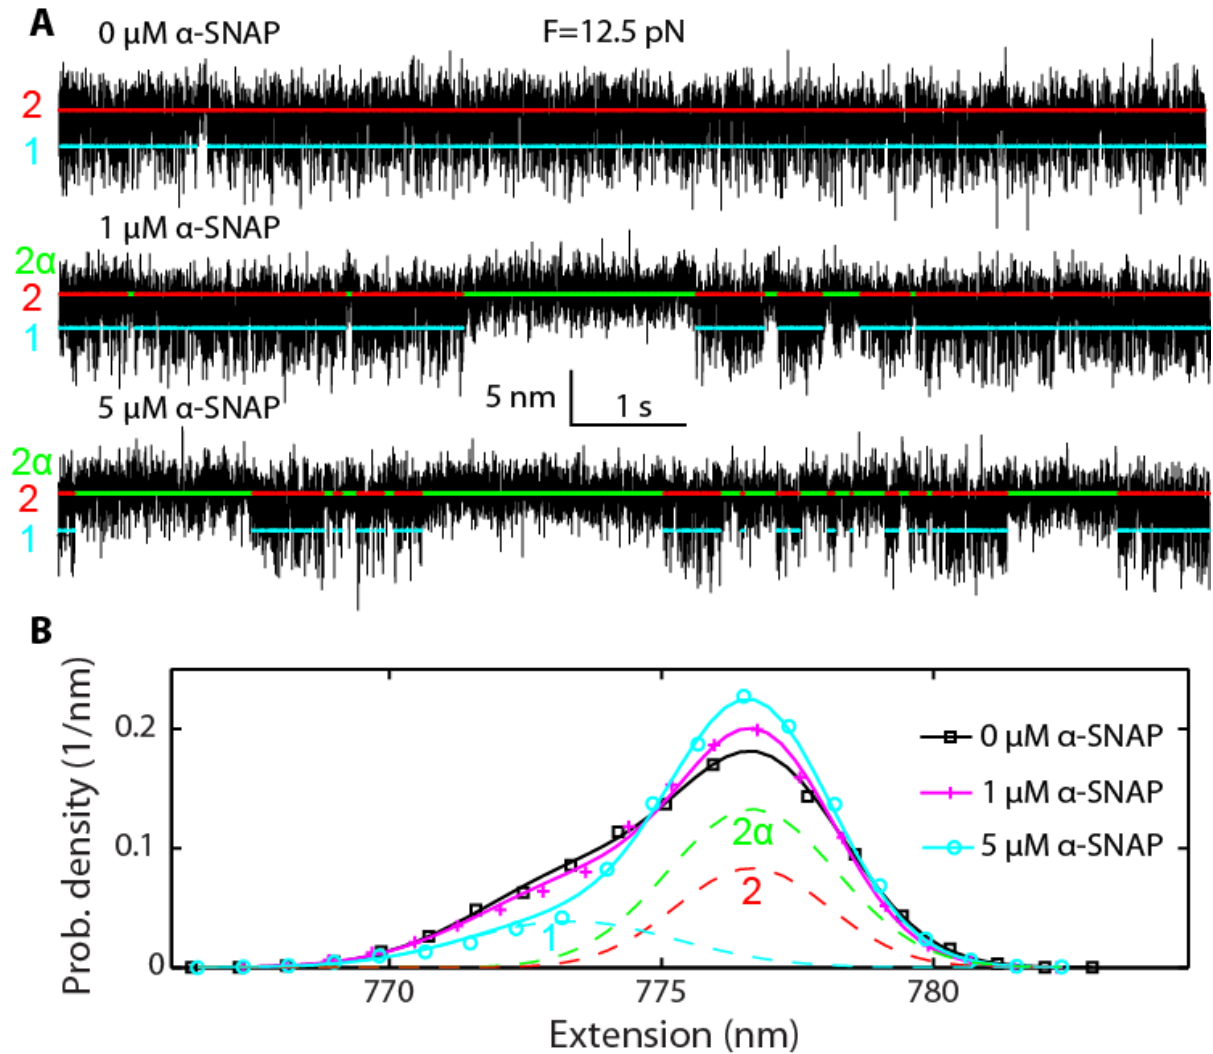

**Figure S1.**  $\alpha$ -SNAP destabilizes SNARE LD. Related to Figure 1

(A) Measured (black) and idealized (colored) extension-time trajectories of a single SNARE complex under a constant mean force of 12.5 pN in different  $\alpha$ -SNAP concentrations. The idealized extensions were derived from three-state hidden-Markov modeling comprising the free 4HB state (state 2 in red), the  $\alpha$ -SNAP-bound 4HB state ( $2\alpha$  in green), and the fully folded state (1 in cyan). States 2 and  $2\alpha$  have identical average extensions. The extension trajectories were mean-filtered to 1 kHz, analyzed by the HMM, and plotted.

(B) Probability density distributions of the extensions shown in A. The measured distributions (symbols) were fit by a sum of three Gaussian functions derived from HMM (solid lines). The three individual Gaussian functions corresponding to the extension trajectory in the presence of 5  $\mu\text{M}$   $\alpha$ -SNAP were plotted in dashed lines with their associated states labeled.

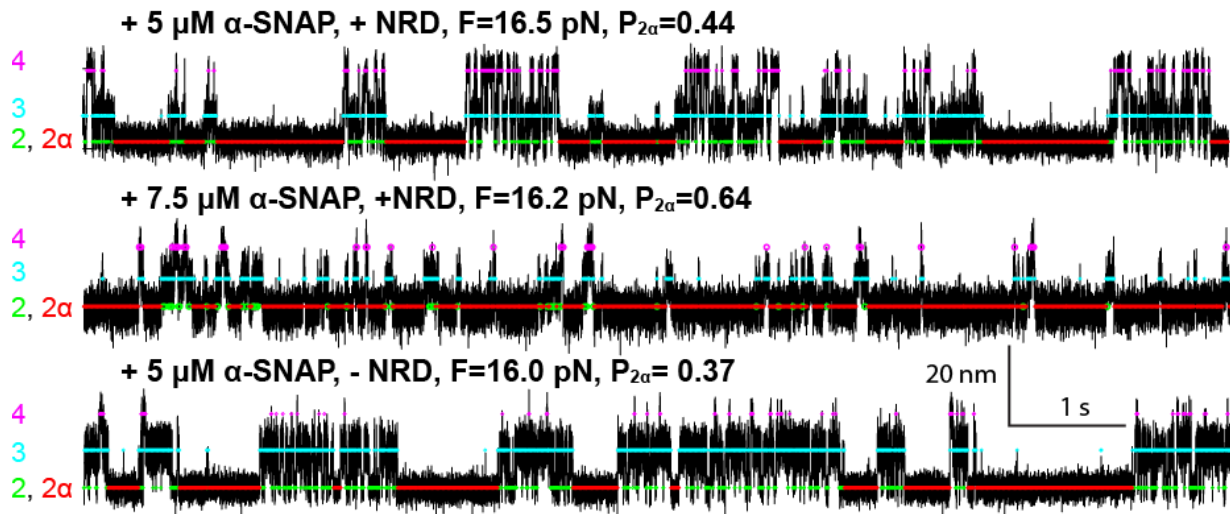

**Figure S2.**  $\alpha$ -SNAP stabilizes the SNARE 4HB in an  $\alpha$ -SNAP concentration-dependent and NRD-independent manner. Related to Figure 2

Measured (black lines) and idealized (colored circles) extension-time trajectories for SNARE complexes with (+ NRD) and without (- NRD) the N-terminal regulatory domain (NRD) in syntaxin. The average extensions of the different folding states derived from HMM are colored and numbered on the left as in Figure 1E: the free 4HB state 2 in green, the  $\alpha$ -SNAP-bound 4HB state 2 $\alpha$  in red, the partially-zipped state 3 in cyan, and the unzipped state 4 in magenta. The mean forces ( $F$ ) and probabilities of state 2 $\alpha$  ( $P_{2\alpha}$ ) are indicated. Compared to the data in Figure 2A,B shown in 1 kHz, data shown here were mean-filtered to 5 kHz and plotted. Observed at a high bandwidth ( $>1$  kHz), the partially-zipped state is further split into two sub-states with similar conformations (1). Since the lifetimes of these sub-states are much shorter than other SNARE states, we ignored the differences of these sub-states in this work to simplify our data analysis and collectively called them the partially zippered state 3.

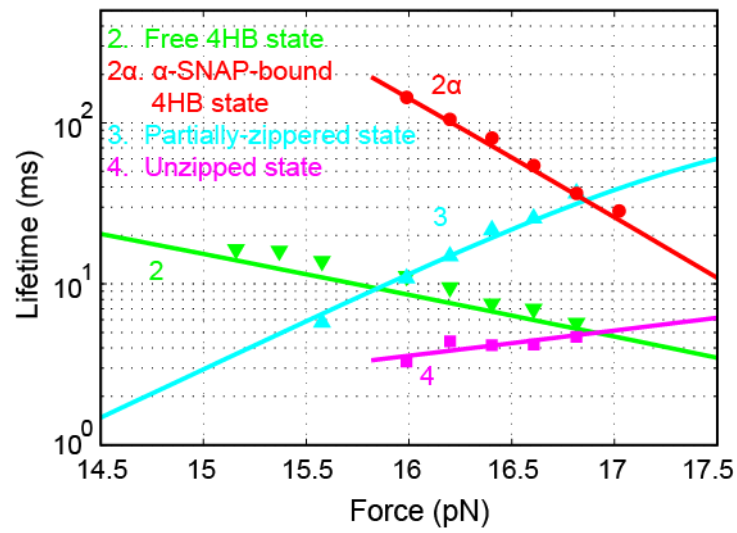

**Figure S3.** Force-Dependent Lifetimes of Different SNARE Folding States (symbols) and Their Best Model Fits (lines). Related to Figure 4  
 The lifetimes were calculated based on the transition rates shown in Figure 4C (see also ‘Experimental Procedures’).

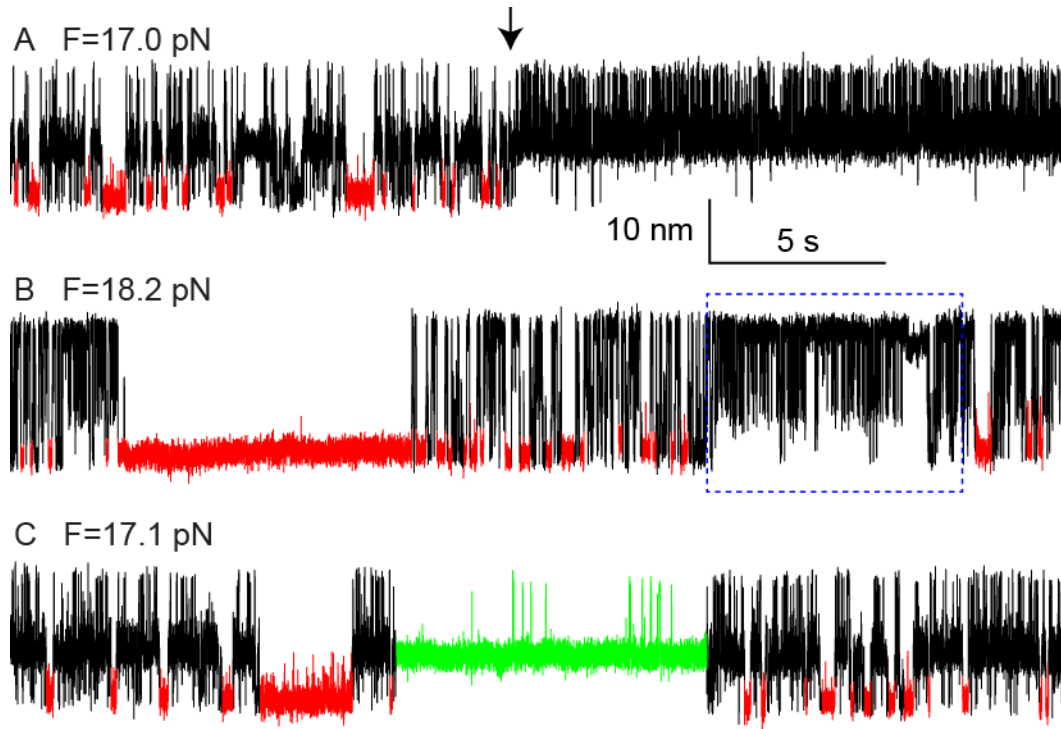

**Figure S4.** Extension-time trajectories showing kinetic heterogeneity of  $\alpha$ -SNAP-SNARE binding. Related to Figure 5  
 The  $\alpha$ -SNAP-bound 4HB and the partially zippered states are highlighted in red and green, respectively. Sudden kinetic switching is indicated by a black arrow in A and a dashed rectangle in B.

## References

1. Ma L, Rebane AA, Yang G, Xi Z, Kang Y, Gao Y, Zhang YL (2016) Munc18-1-regulated stage-wise SNARE assembly underlying synaptic exocytosis. *eLIFE* 4:e09580.
